# Supplementary material for: Chemometrics-assisted excitation–emission matrix fluorescence spectroscopy for rapid identification of commercial reconstituted and sweetened grape juices
Source: Royal Society of Chemistry journal article supplement (doi:10.1039/d2ay01767a), 2022-12-07
Supplement: d2ay01767a1.pdf [file d2ay01767a1.pdf]

## Supplementary materials

### **Chemometrics-assisted excitation-emission matrix fluorescence spectroscopy for rapid identification of commercial reconstituted and sweetened grape juices**

Bing-Bing Liu, Hai-Long Wu\*, Yue Chen, Tong Wang\*, Ru-Qin Yu

*State Key Laboratory of Chemo/Biosensing and Chemometrics, College of Chemistry  
and Chemical Engineering, Hunan University, Changsha 410082, People's Republic of  
China*

\* Corresponding author 1: Hai-Long Wu

*State Key Laboratory of Chemo/Biosensing and Chemometrics, College of Chemistry  
and Chemical Engineering, Hunan University, Changsha 410082, People's Republic  
of China*

Tel. / Fax: (+86) 731 88821818;

E-mail: [hlwu@hnu.edu.cn](mailto:hlwu@hnu.edu.cn)

\* Corresponding author 2: Tong Wang

*State Key Laboratory of Chemo/Biosensing and Chemometrics, College of Chemistry  
and Chemical Engineering, Hunan University, Changsha 410082, People's Republic  
of China*

Tel. / Fax: (+86) 731 88821818;

E-mail: [wangtong@hnu.edu.cn](mailto:wangtong@hnu.edu.cn)

**Table. S1** The specific information of eight chemical compound.

| No. | Analyte              | Abbreviation  | CAS no. <sup>a</sup> | Chemical structure                                                                   | $\lambda_{ex}/\lambda_{em}$ <sup>b</sup><br>(nm) |
|-----|----------------------|---------------|----------------------|--------------------------------------------------------------------------------------|--------------------------------------------------|
| 1   | Methyl anthranilate  | MA            | 134-20-3             | 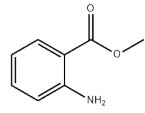   | 245(325)/415                                     |
| 2   | 2'-aminoacetophenone | <i>o</i> -AAP | 551-93-9             |    | 260/460<br>350/465                               |
| 3   | Resveratrol          | RES           | 501-36-0             |    | 265(335)/390                                     |
| 4   | Epicatechin          | EC            | 490-46-0             |    | 230/310<br>280/315                               |
| 5   | Catechin             | CC            | 154-23-4             |   | 230/315<br>280/310                               |
| 6   | Epicatechin gallate  | ECG           | 1257-08-5            |  | 270/325                                          |
| 8   | Gallic acid          | GA            | 149-91-7             |  | 265/335                                          |
| 9   | Caffeic acid         | CA            | 331-39-5             |  | 260/365<br>355/435                               |

<sup>a</sup> CAS no. is from <http://www.chemicalbook.com/>;

<sup>b</sup> The values of  $\lambda_{ex}/\lambda_{em}$  represents the maximum excitation/emission wavelengths of each analyte.

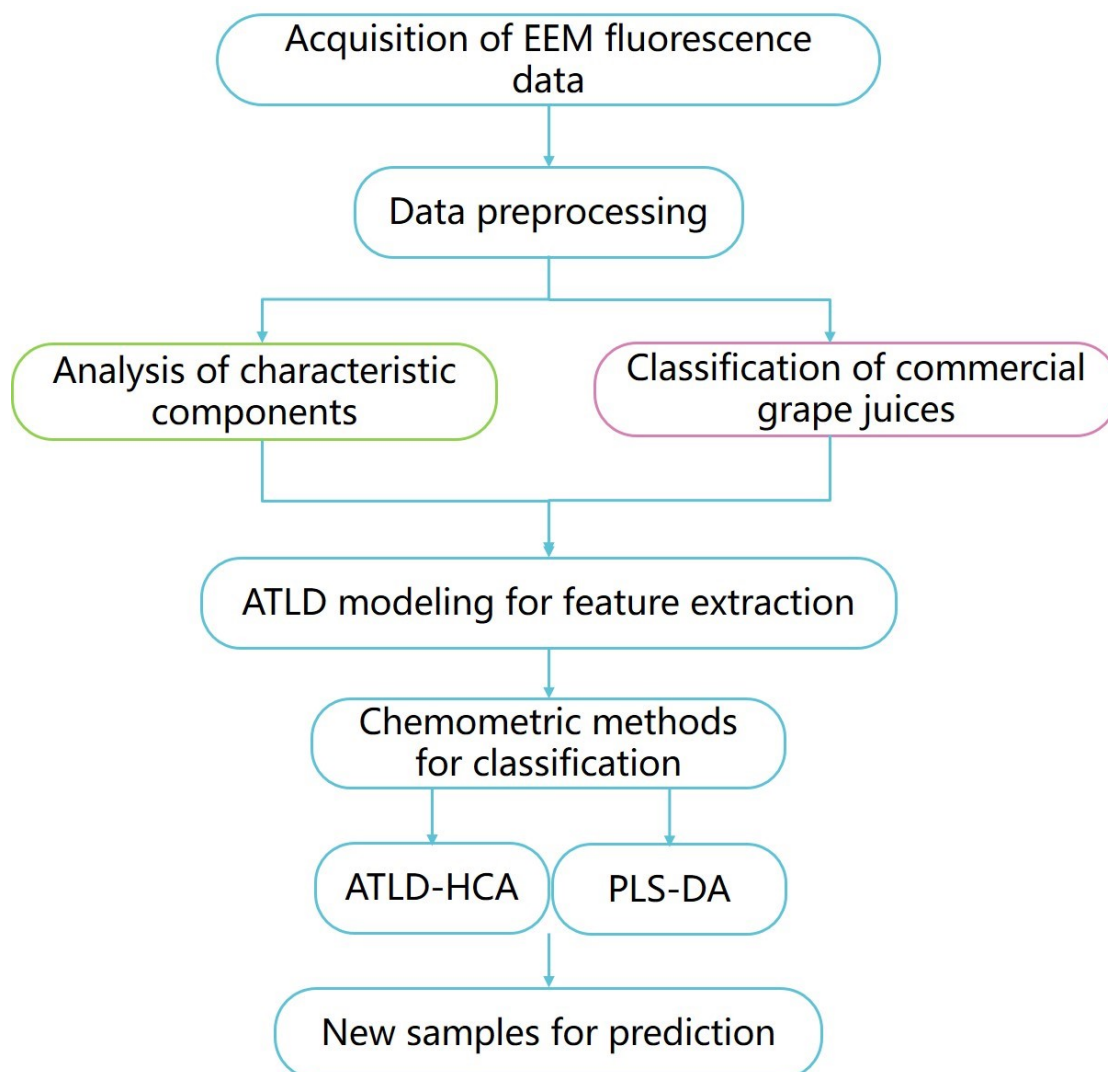

**Fig. S1** The main flow chart of this work.

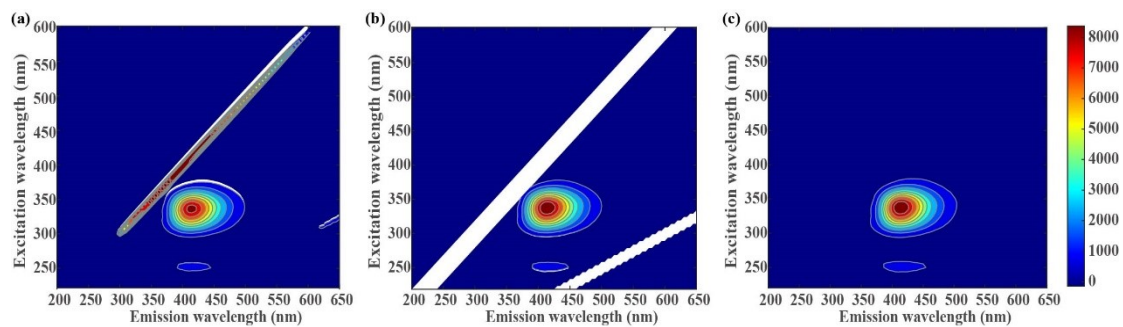

**Fig. S2** The elimination of non-trilinear factor (Rayleigh scattering) in EEM fluorescence data: (a) raw data with visible Rayleigh scattering; (b) gapped data with scattering being removed in the regions; (c) repaired data fitted by an interpolation method.

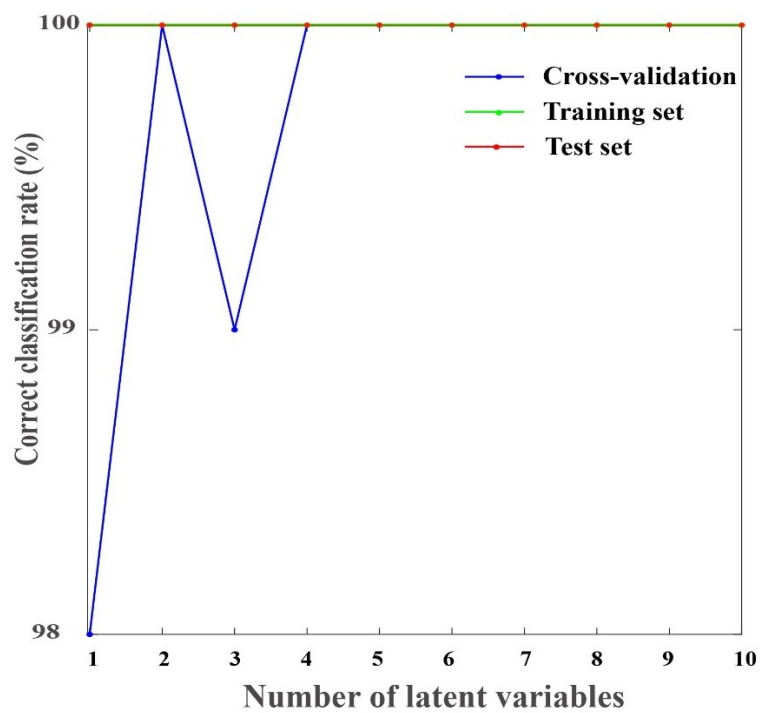

**Fig. S3** Correct classification rates obtained by cross-validation in the training set, training set and test set, respectively, as a function of the *LVs* of PLS-DA.
